# Supplementary material
Source: MDPI journal article supplement (https://www.mdpi.com/2227-9040/10/5/183)
Supplement: s1 [file s1]

## Supplementary Material

### Spectroscopic recognition of metal ions and non-linear optical (NLO) properties of some fluorinated poly(1,3,4-oxadiazole-ether)s

Mihaela Homocianu<sup>1</sup>, Anton Airinei, Alina Mirela Ipate and Corneliu Hamciuc

*“Petru Poni” Institute of Macromolecular Chemistry, 41A, Grigore Ghica Voda Alley,  
700487, Iasi, Romania*

- ***<sup>1</sup>H NMR data***

Also, its molecular structure were established using <sup>1</sup>H NMR data (chloroform-d, 400 MHz, ppm) such as: for **BisFOx** sample, 8.10 (4H, d), 7.63 (1H, d), 7.50 (1H, t), 7.43 (2H, d), 7.18 (4H, d), 7.15 (4H, d), 7.05 (4H, d); for **6FOx** sample, 8.12 (4H, d), 7.42 (4H, d), 7.20 (4H, d), 7.06 (4H, d) and for **9FOx** sample, 7.09 (4H, d, 8.6 Hz, H-2), 7.14 (4H, d, 8.7 Hz, H-3), 7.18 (4H, d, 8.3 Hz, H-13), 7.67 (2H, bs, H-8), 7.91 (1H, bs, H-10), 8.13 (4H, d, 8.2 Hz, H-14) [1].

- ***Changes in absorption and fluorescence spectra after addition of metal ions***

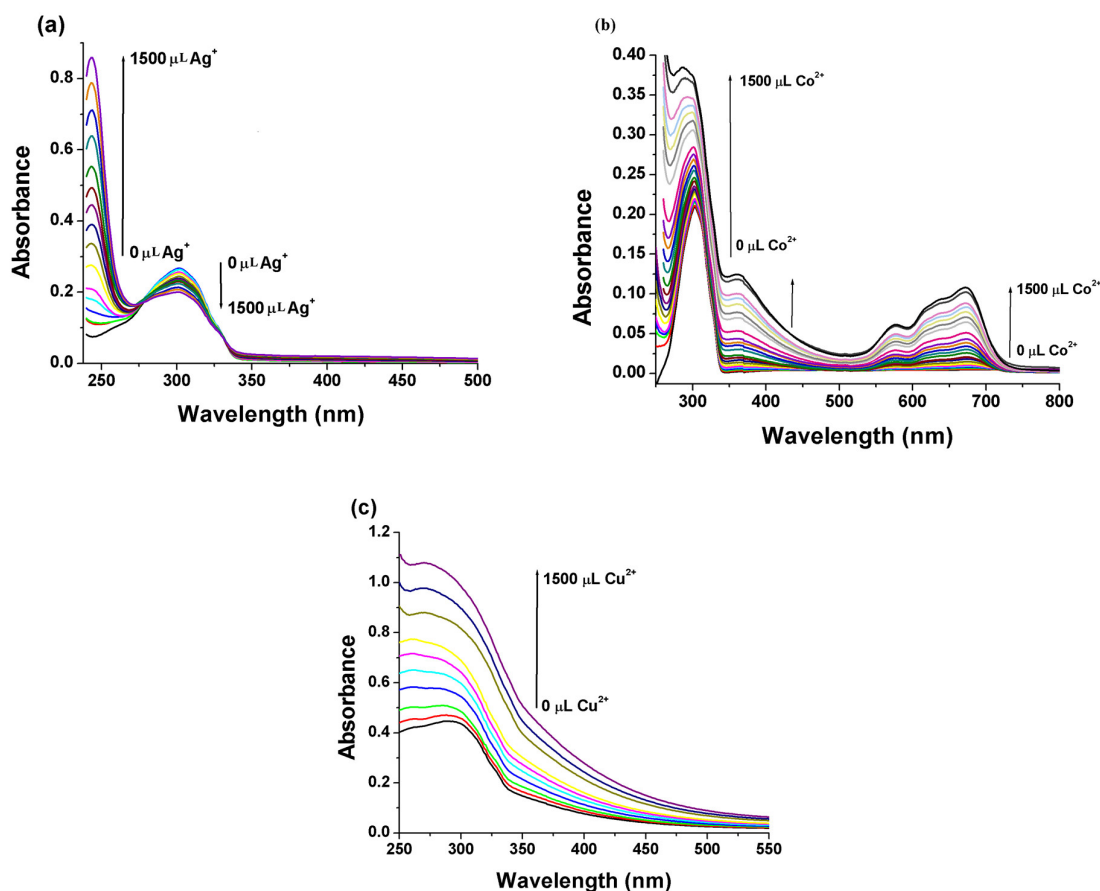

<sup>1</sup> Correspondence author: Tel.: 0232 217 454.

E-mail address: [michalupu@yahoo.co.uk](mailto:michalupu@yahoo.co.uk) or [mlupu@icmpp.ro](mailto:mlupu@icmpp.ro) (Mihaela Homocianu).

**Figure S1.** Absorption spectral changes during the titration of the **9FOx** sample ( $c=1 \times 10^{-5}$  mol L<sup>-1</sup>) with incremental amounts of Ag<sup>+</sup> (a), Co<sup>2+</sup> (b), and Cu<sup>2+</sup> (c) cations.

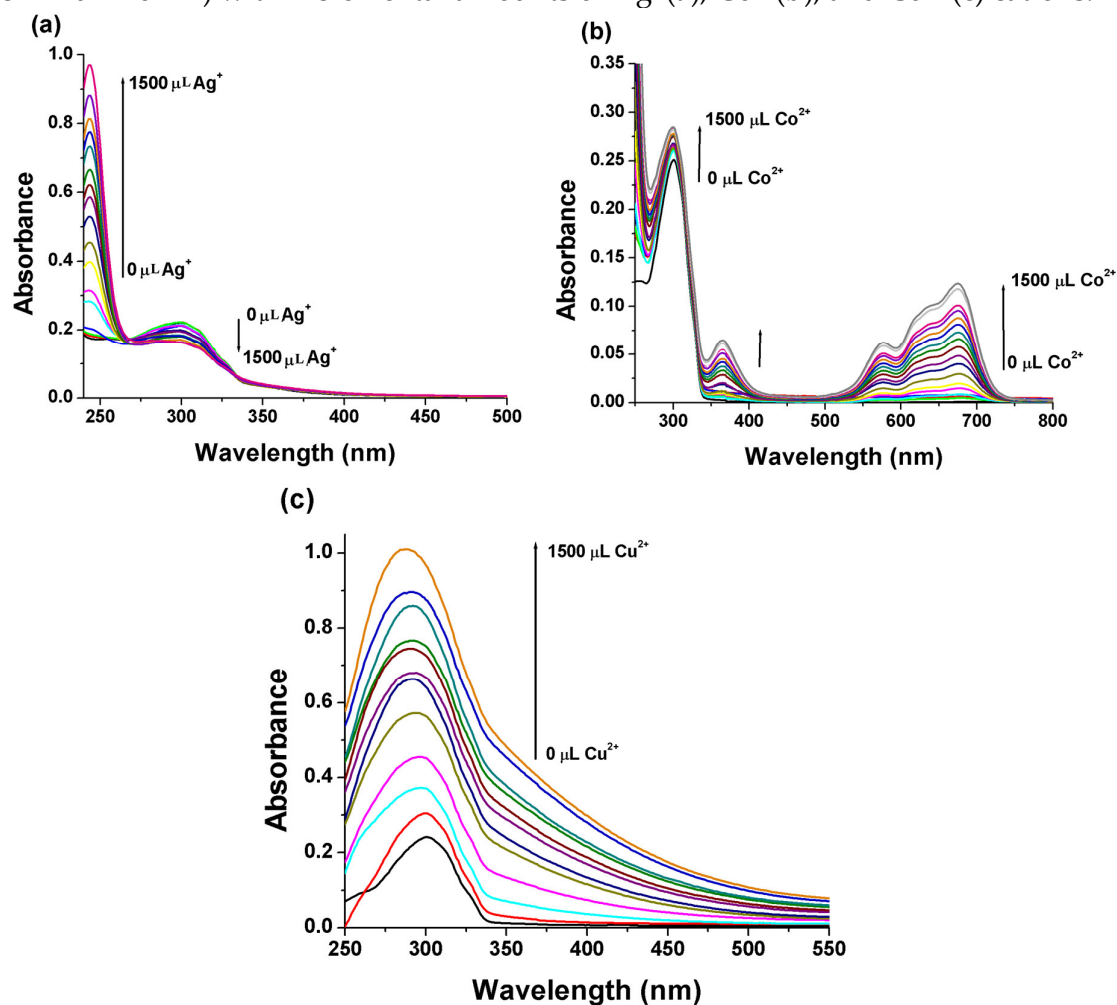

**Figure S2.** Absorption spectral changes during the titration of the **6FOx** sample ( $c=1 \times 10^{-5}$  mol L<sup>-1</sup>) with incremental amounts of Ag<sup>+</sup> (a), Co<sup>2+</sup> (b), and Cu<sup>2+</sup> (c) cations.

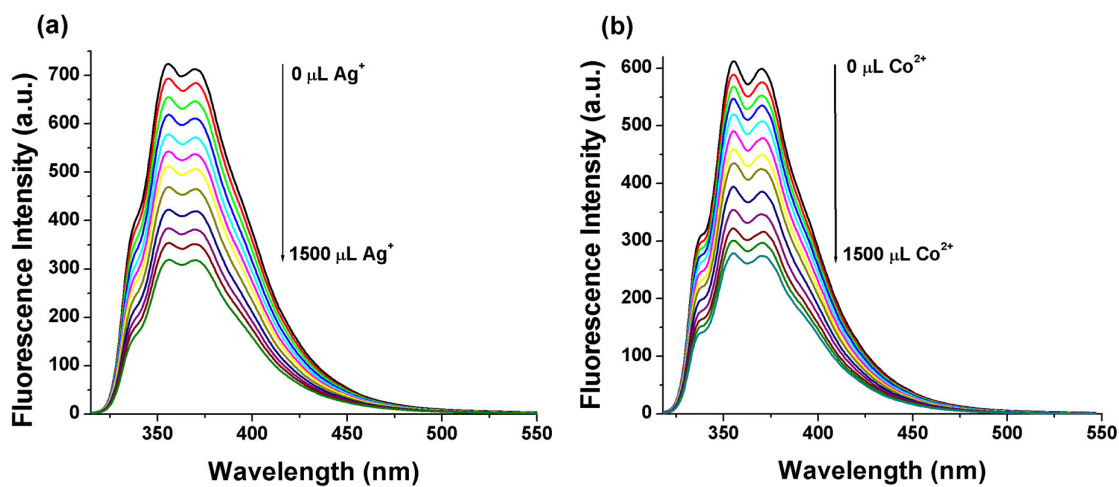

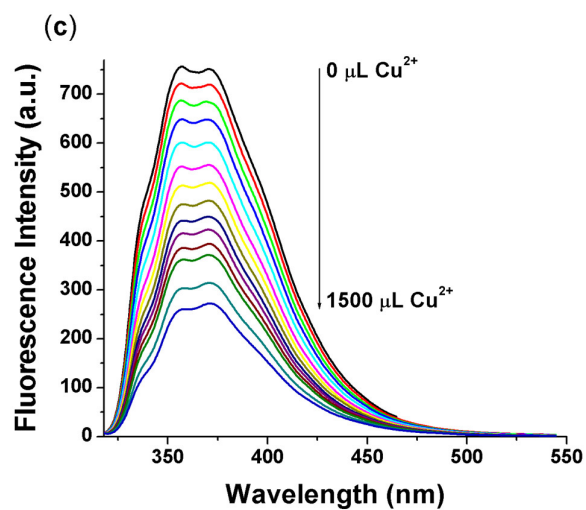

**Figure S3.** Fluorescence spectral changes during the titration of the 9FOx sample ( $c=1\times 10^{-5}$  mol  $\text{L}^{-1}$ ) with incremental amounts of  $\text{Ag}^+$  (a),  $\text{Co}^{2+}$  (b), and  $\text{Cu}^{2+}$  (c) cations.

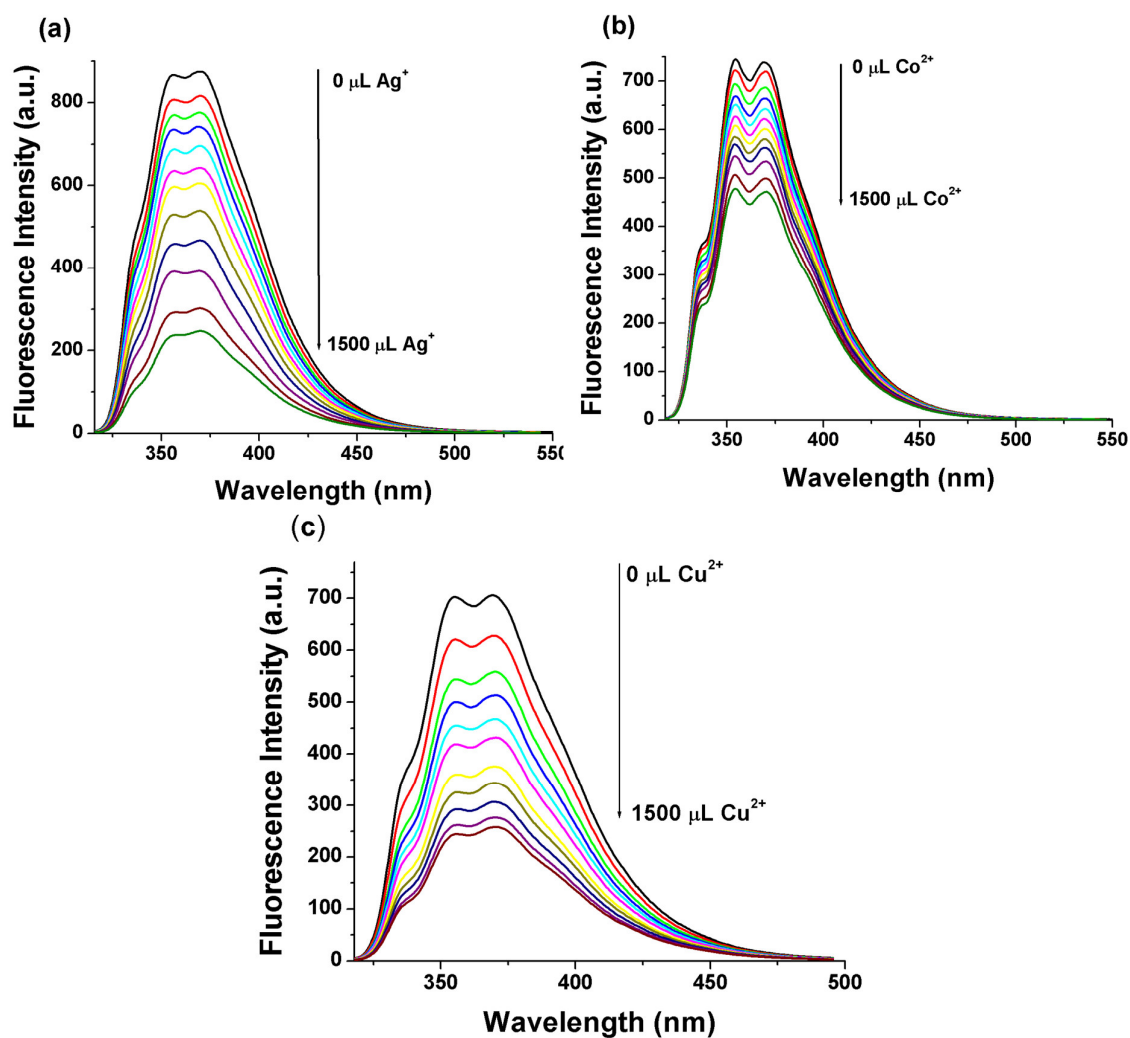

**Figure S4.** Fluorescence spectral changes during the titration of the **6FOx** sample ( $c=1 \times 10^{-5}$  mol L<sup>-1</sup>) with incremental amounts of Ag<sup>+</sup> (**a**), Co<sup>2+</sup> (**b**), and Cu<sup>2+</sup> (**c**) cations.

• *Determination of Onsager cavity radius (a) for BisFOx derivative*

The solvent Onsager cavity radius (a) of the **BisFOx** sample was estimated by the following equation [2]:

$$a = (3M/4\pi\rho N_A)^{1/3} \quad (S1)$$

where, M is the molar mass; N<sub>A</sub> is Avogadro's number ( $6.02214076 \times 10^{23}$ ) and  $\rho$  is the molecular density of **BisFOx** molecules, which was calculated using Bicerano's [3] atomic and bond incremental method, by Eq. (S2):

$$\rho(T) \equiv M / V(T) \quad (S2)$$

where M is the molecular weight of the solute and the V(T) is the molar volume, expressed as:

$$V(298K) \approx 3.642770 \cdot {}^0\chi + 9.798697 \cdot {}^0\chi^v - 8.542819 \cdot {}^1\chi + 21.693912 \cdot {}^1\chi^v + 0.978655 \cdot N_{MV} \quad (S3)$$

where

- ${}^0\chi$  and  ${}^0\chi^v$  are the zero-order simple ( ${}^0\chi = \sum (1/\sqrt{\delta})$ ) and valence ( ${}^0\chi^v = \sum (1/\sqrt{\delta^v})$ ) connectivity indices;
- $\delta$  and  $\delta^v$  are the atomic simple and valence connectivity indices;
- ${}^1\chi$  and  ${}^1\chi^v$  are the zero-order simple ( ${}^1\chi = \sum (1/\sqrt{\beta})$ ) and valence ( ${}^1\chi^v = \sum (1/\sqrt{\beta^v})$ ) connectivity indices. The values of these parameters for C, N, and O atoms are listed in **Table S1**.

**Table S1.** Values of the atomic simple connectivity indices,  $\delta$ , and valence connectivity indices  $\delta^v$  used for calculating zero- and first-order connectivity indices [3].

| Atom | Hyb | N <sub>H</sub> | $\delta$ | $\delta^v$ |
|------|-----|----------------|----------|------------|
| C    | sp3 | 3              | 1        | 1          |
|      |     | 2              | 2        | 2          |
|      |     | 0              | 4        | 4          |
|      | sp2 | 1              | 2        | 3          |
|      |     | 0              | 3        | 4          |
| N    | sp2 | 0              | 2        | 5          |

|   |     |   |   |   |
|---|-----|---|---|---|
| O | sp3 | 0 | 2 | 6 |
|---|-----|---|---|---|

- $N_{MV}$  is the total values of the number of elements (carbon-carbon double bonds, nonaromatic rings and other elements from the repeating unit), calculated based on Eq. (S4).

$$N_{MV} \equiv 24N_{Si} - 18N_{(-S-)} - 5N_{sulfone} - 7N_{Cl} - 16N_{Br} + 2N_{(backbone\ ester)} + 3N_{ether} + 5N_{carbonate} + 5N_{C=C} - 11N_{cyc} - 7 \cdot (N_{fused} - 1) \text{ (last term only to be used if } N_{fused} \geq 2) \quad (S4)$$

- here  $N_{Si}$ ,  $N_{-S-}$ ,  $N_{sulfone}$ ,  $N_{Cl}$ ,  $N_{Br}$ , is the number of silicon atoms, sulfur atoms in the lowest oxidation state, sulfur atoms in the highest oxidation state, chlorine atoms, bromine atoms, respectively in the polymeric repeat unit;  $N_{(backbone\ ester)}$  is the number of ester (-COO-) groups, in the backbone of the repeat unit;  $N_{ether}$  is the total number of ether (-O-) linkages, in the polymeric repeat unit;  $N_{carbonate}$  is the total number of carbonate (-OCOO-) groups, in the polymeric repeat unit;  $N_{(C=C)}$  is the number of carbon-carbon double bonds, in the repeat unit;  $N_{cyc}$  is the number of nonaromatic rings with no double bonds along any of the edges of the ring;  $N_{(fused-1)}$  is the rings in fused ring structures.

Thus, the values for the  $V(T)$  and  $\rho$  parameters of **BisFox** sample are:

$$V(T) = 3.642770 \cdot 32.89 + 9.798697 \cdot 23.545 + 8.542819 \cdot 22.226 + 21.693912 \cdot 18.368 + 0.978655 \cdot 81 = 638.393 \text{ cc/mole} \quad (S5)$$

$$\rho = (630/638.393) = 0.987 \text{ g cm}^{-3}$$

Replacing, the calculated  $\rho$  values ( $0.987 \text{ g cm}^{-3}$ ) in **Eq. S1**, we found that the values for the Onsager cavity radius of the **BisFox** sample be  $6.33 \text{ \AA}$ .

## References

1. Ipate, AM.; Homocianu, M.; Hamciuc, C.; Airinei, A.; Bruma, M. Photophysical behavior of some aromatic poly1,3,4-oxadiazole-ethers derivatives. *Spectrochim. Acta A Mol. Biomol. Spectrosc* **2014**, 123, 167–175. <https://doi.org/10.1016/j.saa.2013.12.057>.

2. Suppan, P. Excited-state dipole moments from absorption/fluorescence solvatochromic ratios, *Chem. Phys. Lett.* **1983**, 94, 272–275. [https://doi.org/10.1016/0009-2614\(83\)87086-9](https://doi.org/10.1016/0009-2614(83)87086-9).
3. Bicerano, J. Prediction of Polymer Properties; Marcel Dekker: New York, NY, USA, 2000.
